# Supplementary material for: Defect Engineering of Disordered Carbon Anodes with Ultra-High Heteroatom Doping Through a Supermolecule-Mediated Strategy for Potassium-Ion Hybrid Capacitors
Source: PubMed Central journal article supplement (PMC9883381; doi:10.1007/s40820-022-01006-0), 2023-01-27
Supplement: 40820_2022_1006_MOESM1_ESM.pdf [file 40820_2022_1006_MOESM1_ESM.pdf]

Supporting Information for

## Defect Engineering of Disordered Carbon Anodes with Ultra-High Heteroatom Doping through A Supermolecule-Mediated Strategy for Potassium Ion Hybrid Capacitors

Lei Zhao<sup>1, a</sup>, Shirong Sun<sup>1, a</sup>, Jinxin Lin<sup>1, a</sup>, Lei Zhong<sup>1</sup>, Liheng Chen<sup>1</sup>, Jing Guo<sup>3</sup>, Jian Yin<sup>4</sup>, Husam N. Alshareef<sup>4, \*</sup>, Xueqing Qiu<sup>1, 2, \*</sup> and Wenli Zhang<sup>1, 2, 5, \*</sup>

<sup>1</sup> Guangdong Provincial Key Laboratory of Plant Resources Biorefinery, School of Chemical Engineering and Light Industry, Guangdong University of Technology (GDUT), 100 Waihuan Xi Road, Panyu District, Guangzhou 510006, P. R. China

<sup>2</sup> Jieyang Branch of Chemistry and Chemical Engineering Guangdong Laboratory (Rongjiang Laboratory), Jieyang 515200, P. R. China

<sup>3</sup> Key Laboratory of Dielectric and Electrolyte Functional Material Hebei Province, School of Resources and Materials, Northeastern University at Qinhuangdao, Qinhuangdao 066004, P. R. China

<sup>4</sup> Materials Science and Engineering, Physical Science and Engineering Division, King Abdullah University of Science and Technology (KAUST), Thuwal 23955-6900, Saudi Arabia

<sup>5</sup> Research Institute of Green Chemical Engineering and Advanced Materials, School of Advanced Manufacturing, Guangdong University of Technology (GDUT), Jieyang, Jieyang 515200, P. R. China

<sup>a</sup> Lei Zhao, Shirong Sun, and Jinxin Lin contributed equally to this work.

\* Corresponding authors. E-mail: [husam.alshareef@kaust.edu.sa](mailto:husam.alshareef@kaust.edu.sa) (H. N. Alshareef); [cexqqiu@scut.edu.cn](mailto:cexqqiu@scut.edu.cn) (X. Qiu); [wzhang@gdut.edu.cn](mailto:wzhang@gdut.edu.cn) (W. Zhang)

## S1 Experimental Methods

### S1.1 Electrochemical Equations and Calculations

In PIHCs full-cell tests, the calculations of energy ( $E$ ,  $Wh\ kg^{-1}$ ) and power densities ( $P$ ,  $W\ kg^{-1}$ ) based on the total mass of both anode and cathode materials were performed using the equations below [S1, S2]:

$$P = \Delta V \times i \quad (S1)$$

$$E = P \times t/3600 \quad (S2)$$

$$\Delta V = (V_{max} + V_{min})/2 \quad (S3)$$

in which  $t$  (s) is the discharge time,  $i$  ( $A\ g^{-1}$ ) is the charge/discharge current,  $V_{max}$  (V) is the discharge potential excluding the IR drop, and  $V_{min}$  (V) is the potential at the end of discharge voltages.

The contributions to capacitive controlled and diffusion-controlled processes are estimated as follows [S3]:

$$i = av^b \quad (S4)$$

$$i = k_1v + k_2v^{\frac{1}{2}} \quad (S5)$$

or

$$\frac{i}{v^{\frac{1}{2}}} = k_1v^{\frac{1}{2}} + k_2 \quad (S6)$$

where  $i$  is the instantaneous current density,  $v$  is the scanning rate, and  $a$  and  $b$  are adjustable parameters obtained from the  $v_1$  and  $v_2$  scanning rates, respectively. The electrode reaction is controlled by the diffusion process when the value of  $b$  is 0.5, and the electrode response is controlled by the surface-dominated process when the  $b$  value is 1. The contributions of the capacitive current and the diffusion-controlled current to the whole electrode reaction process are represented by the  $k_1v$  and  $k_2v^{1/2}$  in equations (S5) and (S6), respectively.

The diffusion coefficients of  $K^+$  were calculated from the Galvanostatic Intermittent Titration Technique (GITT) using the following equation [S4].

$$D_{K^+} = \frac{4}{\pi\tau} \left( \frac{m_B V_M}{M_B S} \right)^2 \left( \frac{\Delta E_s}{\Delta E_\tau} \right)^2 \quad (S7)$$

Where  $\tau$  denotes the duration of the current pulse, s;  $m_B$  is the mass of electrode active material, g;  $S$  is the geometric area of the electrode,  $\text{cm}^2$ ;  $\Delta E_s$  is the quasi-thermodynamic equilibrium potential difference before and after the current pulse, V;  $\Delta E_\tau$  is the potential difference during current pulse neglecting the IR-drop, V;  $V_M$  is the molar volume of the active materials,  $M_B$  is the molar mass of carbon. The value of  $M_B/V_M$  is the density of electrodes ( $1.5 \text{ g cm}^{-3}$ ), which is estimated to be lower than the density of graphite ( $2.2 \text{ g cm}^{-3}$ ). Before the GITT measurement, the NSLPCs electrodes were pre-cycled for three cycles under a constant current density of  $50 \text{ mA g}^{-1}$ .

## S2 Molecular Dynamic Simulation and Density Functional Theory Calculation

Firstly, Hundreds of initial configurations were generated by the genmer module of the Molclus program [S5]. All the clusters were then pre-optimized under the semi-empirical method GFN2-Xtb [S6]. The obtained configurations with the low energy were further optimized and calculated the frequency under B3LYP-D3(BJ)/6-31G\* level using Gaussian16 package with the consideration of implicit solvent model. The interaction energy between the LS and MA+TCA and the energy among the MA and TCA molecules were calculated with the correction of basis set superposition error (BSSE) under the B3LYP-D3(BJ)/6-311G\*\* level. To study the weak interaction among the molecules, the Independent gradient model based on Hirshfeld partition (IGMH) [S7] were analyzed by Multiwfn 3.8 (dev) program [S8] and visualized by VMD 1.9.4. software [S9].

All the calculations are performed in the framework of the density functional theory with the projector augmented plane-wave method, as implemented in the Vienna ab initio simulation package [S10]. The generalized gradient approximation proposed by Perdew, Burke, and Ernzerhof is selected for the exchange-correlation potential [S11]. The long-range van der Waals interaction is described by the DFT-D3 approach [S12]. The cut-off energy for the plane wave is set to 500 eV. The energy criterion is set to  $10^{-6}$  eV in the iterative solution of the Kohn-Sham equation. The Brillouin zone integration is performed at the Gamma point with a  $2 \times 2 \times 1$  k-mesh grid for structural optimization calculations and a  $6 \times 6 \times 1$  k-mesh grid for the electronic structure calculations. All the structures are relaxed until the residual forces on the atoms have declined to less than  $0.03 \text{ eV \AA}^{-1}$ . The vacuum thickness along the z-axis is set to  $15 \text{ \AA}$ , which is large enough to avoid interaction between periodic images.

## S3 Supporting Figures and Tables

Table S1 Porosity parameters of NSLPCs samples

| Sample     | $S_{BET}$<br>( $m^2 g^{-1}$ ) | $V_{Total}$<br>( $cm^3 g^{-1}$ ) | $V_{micro}$<br>( $cm^3 g^{-1}$ ) | $V_{meso}$<br>( $cm^3 g^{-1}$ ) | $V_{micro}/V_{total}$<br>(%) | $D_{ave}$<br>(nm) |
|------------|-------------------------------|----------------------------------|----------------------------------|---------------------------------|------------------------------|-------------------|
| NSLPC-700  | 229                           | 0.56                             | 0.02                             | 0.54                            | 96.4                         | 10.8              |
| NSLPC-800  | 362                           | 0.95                             | 0.06                             | 0.89                            | 93.6                         | 18.1              |
| NSLPC-900  | 322                           | 1.52                             | 0.02                             | 1.50                            | 98.7                         | 21.5              |
| NSLPC-1000 | 589                           | 1.86                             | 0.08                             | 1.78                            | 95.7                         | 17.3              |

Table S2 Atomic elemental content of NSLPCs

| sample     | C (at%) | N (at%) | O (at%) | S (at%) |
|------------|---------|---------|---------|---------|
| NSLPC-700  | 70.0    | 21.6    | 7.6     | 0.8     |
| NSLPC-800  | 76.4    | 17.0    | 6.0     | 0.6     |
| NSLPC-900  | 88.2    | 7.2     | 4.0     | 0.6     |
| NSLPC-1000 | 92.5    | 2.4     | 3.9     | 1.2     |

Table S3 Table of binding energies and element content for different bond types

| Bonding type | NSLPC-700                                  | NSLPC-800   | NSLPC-900   | NSLPC-1000  |             |
|--------------|--------------------------------------------|-------------|-------------|-------------|-------------|
| C 1s         | C=C/C-C                                    | 284.8       | 284.8       | 284.8       | 284.8       |
|              | C-N                                        | 286.0       | 285.8       | 285.8       | 285.9       |
|              | C-S                                        | 287.2       | 287.9       | 287.3       | 287.0       |
|              | C=O                                        | 288.7       | 289.7       | 229.5       | 288.8       |
|              | O-C=O                                      | 291.0       | 291.8       | 291.6       | 290.7       |
| O 1s         | C=O                                        | 531.4       | 530.9       | 530.9       | 531.0       |
|              | C-OH/C-O-C                                 | 532.5       | 532.2       | 532.1       | 532.4       |
|              | -COOH/H <sub>2</sub> O                     | 534.0       | 533.4       | 533.2       | 533.5       |
| N 1s         | Pyridinic-N                                | 398.2       | 398.2       | 398.1       | 398.3       |
|              | Pyrolic-N                                  | 399.6       | 399.7       | 399.6       | 399.2       |
|              | Graphitic-N                                | 400.2       | 400.3       | 400.8       | 401.2       |
|              | Oxidized-N                                 | 401.2       | 402.4       | 402.6       | 403.2       |
| S 2p         | S 2p <sub>3/2</sub> (C-S-C)                | 163.9       | 163.7       | 163.8       | 163.7       |
|              | S 2p <sub>1/2</sub> (C-SO <sub>x</sub> -C) | 165.1       | 165.2       | 164.7       | 164.9       |
|              | Oxidized-S (-SO <sub>x</sub> -)            | 167.4/168.5 | 167.5/168.8 | 167.3/168.6 | 167.5/168.7 |

**Table S4** Different chemical bonding concentrations of NSLPCs

|      | Bonding type                               | NSLPC-700 (%) | NSLPC-800 (%) | NSLPC-900 (%) | NSLPC-1000 (%) |
|------|--------------------------------------------|---------------|---------------|---------------|----------------|
| C 1s | C=C/C-C                                    | 51.3          | 39.5          | 55.8          | 61.8           |
|      | C-N                                        | 27.3          | 46.2          | 24.1          | 16.8           |
|      | C-S                                        | 9.6           | 6.7           | 10.2          | 10.1           |
|      | C=O                                        | 7.7           | 5.6           | 7.4           | 5.0            |
|      | O-C=O                                      | 4.1           | 1.9           | 2.6           | 6.3            |
|      | C=O                                        | 44.8          | 39.0          | 51.1          | 51.1           |
| O 1s | C-OH/C-O-C                                 | 37.2          | 26.9          | 23.8          | 28.2           |
|      | -COOH/H <sub>2</sub> O                     | 18.0          | 34.1          | 25.1          | 20.6           |
| N 1s | Pyridinic-N                                | <b>42.7</b>   | 35.7          | 31.2          | 13.8           |
|      | Pyrrolic-N                                 | <b>42.3</b>   | 45.8          | 18.2          | 14.8           |
|      | Graphitic-N                                | 8.6           | 8.3           | 27.1          | 44.8           |
|      | Oxidized-N                                 | 6.4           | 10.2          | 22.9          | 26.7           |
| S 2p | S 2p <sub>3/2</sub> (C-S-C)                | 26.9          | 12.4          | 29.1          | 34.7           |
|      | S 2p <sub>1/2</sub> (C-SO <sub>x</sub> -C) | 26.4          | 49.7          | 13.4          | 37.2           |
|      | Oxidized-S (-SO <sub>x</sub> -)            | 43.3          | 37.9          | 57.5          | 28.1           |

**Table S5** Comparison of different defective carbon anode materials of PIHCs

| Materials                                                          | Current density (A g <sup>-1</sup> ) | Initial coulombic Efficiency (%) | Refs.                                                        |
|--------------------------------------------------------------------|--------------------------------------|----------------------------------|--------------------------------------------------------------|
| S/N@C                                                              | 0.05                                 | 24.6                             | Adv.Mater.2019, 31, 1805430<br>DOI:10.1002/adfm.201801989    |
| nitrogen-doped graphitic nanocarbons-600                           | 0.05                                 | 15.5                             | Adv. Funct. Mater. 2019, DOI: 10.1002/adfm.2019036411903641. |
| nitrogen-doped hierarchical porous hollow carbon spheres           | 0.028                                | 37.1                             | Adv. Funct. Mater. 2019, DOI: 10.1002/adfm.2019034961903496. |
| nitrogen/oxygen in situ dual-doped hierarchical porous hard carbon | 0.05                                 | 25                               | Adv. Mater. 2018, 30, 1700104.<br>DOI:10.1002/adma.201700104 |
| N/O dual-doped carbon network                                      | 0.05                                 | 47.1                             | Energy Storage Mater. 2019, DOI: 10.1016/j.ensm.2019.05.037  |
| three-dimensional nitrogen-doped framework carbon                  | 0.1                                  | 24.3                             | Energy Storage Mater. 2019, DOI: 10.1016/j.ensm.2019.04.008. |

|                                  |             |             |                                                                     |
|----------------------------------|-------------|-------------|---------------------------------------------------------------------|
| carbon nanosheets <sup>750</sup> | 0.05        | 38          | Adv. Energy Mater. 2019, 9, 1803894.<br>DOI:10.1002/aenm.201803894  |
| nitrogen-doped carbon nanosheets | 0.05        | 20          | Adv. Funct. Mater. 2018, 28, 1801989.<br>DOI:10.1002/adfm.201801989 |
| <b>NSLPC-700</b>                 | <b>0.05</b> | <b>48.0</b> | <b>This work</b>                                                    |

**Table S6** Comparison of different defective carbon anode materials for PIHCs

| Anode                                     | Specific capacity                                      | Rate capability                                     | Cyclic stability                                                      | Refs.                                 |
|-------------------------------------------|--------------------------------------------------------|-----------------------------------------------------|-----------------------------------------------------------------------|---------------------------------------|
| N-doped hollow carbon                     | 307 mAh g <sup>-1</sup> at 0.05 A g <sup>-1</sup>      | 200 mAh g <sup>-1</sup> at 1 A g <sup>-1</sup>      | 160 mAh g <sup>-1</sup> after 800 cycles at 1 A g <sup>-1</sup>       | Nano Energy 2019, 65, 104038.         |
| N, S co-doped carbon                      | 276 mAh g <sup>-1</sup> at 0.1 A g <sup>-1</sup>       | 218.5 mAh g <sup>-1</sup> at 3 A g <sup>-1</sup>    | 144.9 mAh g <sup>-1</sup> after 1200 cycles at 3 A g <sup>-1</sup>    | Adv. Energy Mater. 2019, 9, 1901379.  |
| N, S co-doped 3D porous carbon nanosheets | 392 mAh g <sup>-1</sup> at 0.1 A g <sup>-1</sup>       | 265 mAh g <sup>-1</sup> at 1 A g <sup>-1</sup>      | 271 mAh g <sup>-1</sup> after 1000 cycles at 1 A g <sup>-1</sup>      | Adv. Energy Mater. 2019, 9, 1901533   |
| Pitch-derived soft carbon                 | 296 mAh g <sup>-1</sup> at 0.1 C                       | 115.2 mAh g <sup>-1</sup> at 5 C                    | retention after 1000 cycles at 1 C                                    | Adv. Mater. 2020, 32, 2000505.        |
| N/O dual-doped hard carbon                | 304.6 mAh g <sup>-1</sup> at 0.1 A g <sup>-1</sup>     | 223.4 mAh g <sup>-1</sup> at 1 A g <sup>-1</sup>    | 189.5 mAh g <sup>-1</sup> after 5000 cycles at 1 A g <sup>-1</sup>    | Adv. Sci. 2020, 7, 1902547.           |
| Highly N-doped carbon nanofibers          | 217 mAh g <sup>-1</sup> at 0.2 A g <sup>-1</sup>       | 101 mAh g <sup>-1</sup> at 20 A g <sup>-1</sup>     | 191 mAh g <sup>-1</sup> after 200 cycles at 0.2 A g <sup>-1</sup>     | Nat. Commun. 2018, 9, 1720.           |
| Edge N-doped carbon spheres               | 290 mAh g <sup>-1</sup> at 0.2 A g <sup>-1</sup>       | 195 mAh g <sup>-1</sup> at 1 A g <sup>-1</sup>      | 305 mAh g <sup>-1</sup> after 600 cycles at 0.2 A g <sup>-1</sup>     | Angew. Chem. Int. Ed. 2020, 59, 4448. |
| 3D Carbon framework                       | 348.2 mAh g <sup>-1</sup> at 0.05 A g <sup>-1</sup>    | 245 mAh g <sup>-1</sup> at 2 A g <sup>-1</sup>      | 188.8 mAh g <sup>-1</sup> after 2000 cycles at 1 A g <sup>-1</sup>    | ACS Energy Lett. 2020, 5, 1653.       |
| <b>NSLPC-700</b>                          | <b>419 mAh g<sup>-1</sup> at 0.05 A g<sup>-1</sup></b> | <b>246 mAh g<sup>-1</sup> at 1 A g<sup>-1</sup></b> | <b>179 mAh g<sup>-1</sup> after 1500 cycles at 2 A g<sup>-1</sup></b> | <b>This work</b>                      |

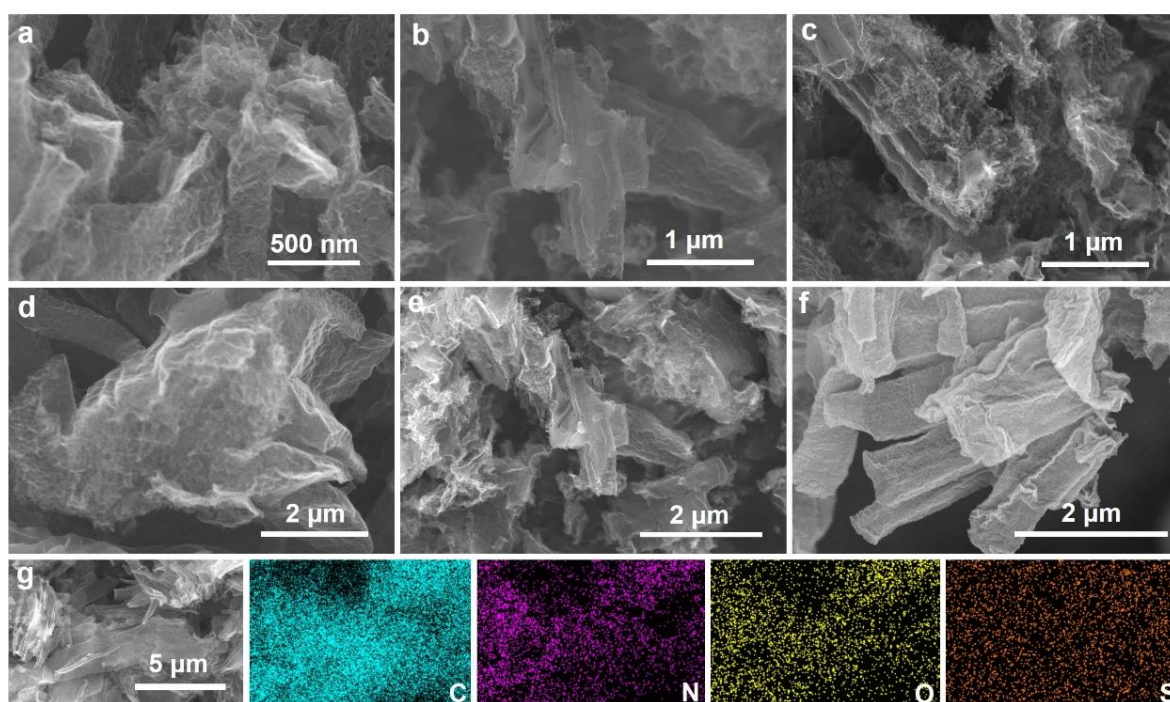

**Fig. S1** (a, d) SEM image of NSLPC-800, (b, e) SEM image of NSLPC-900, (c, f) SEM image of NSLPC-1000, and the (g) Energy dispersive spectroscopy (EDS) mapping images of NSLPC-800 for the elements of carbon, nitrogen, oxygen, and sulfur

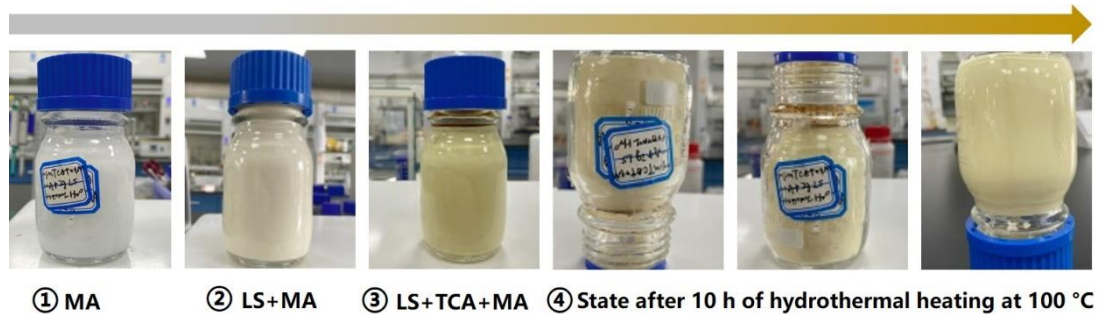

**Fig. S2** Digital figures for the different states for the synthesis of the supermolecule precursors at each stage

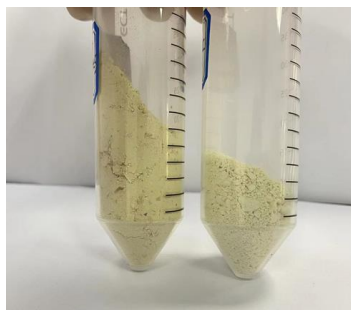

**Fig. S3** Digital pictures of a mixture of (left) TCA+MA+LS and a mixture of (right) TCA+MA

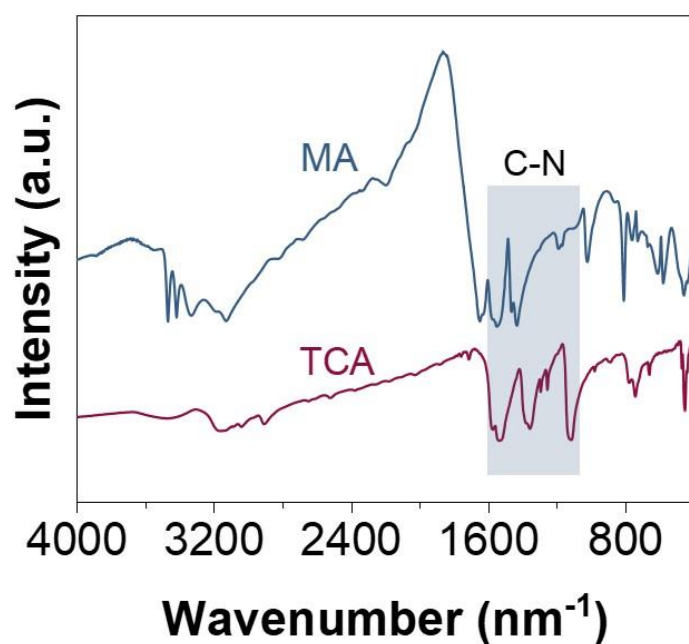

Fig. S4 FT-IR spectra of the TCA and MA

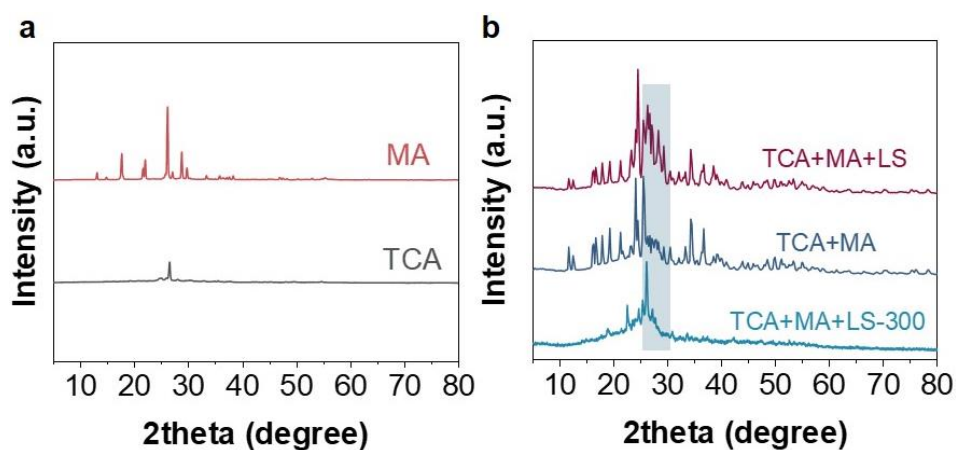

Fig. S5 (a) The XRD patterns of TCA and MA, (b) The XRD patterns of TCA+MA+LS, TCA+MA, and TCA+MA+LS-300 (heat-treated at 300 °C). Heat treatment of TCA+MA+LS would not cause apparent change in its XRD patterns

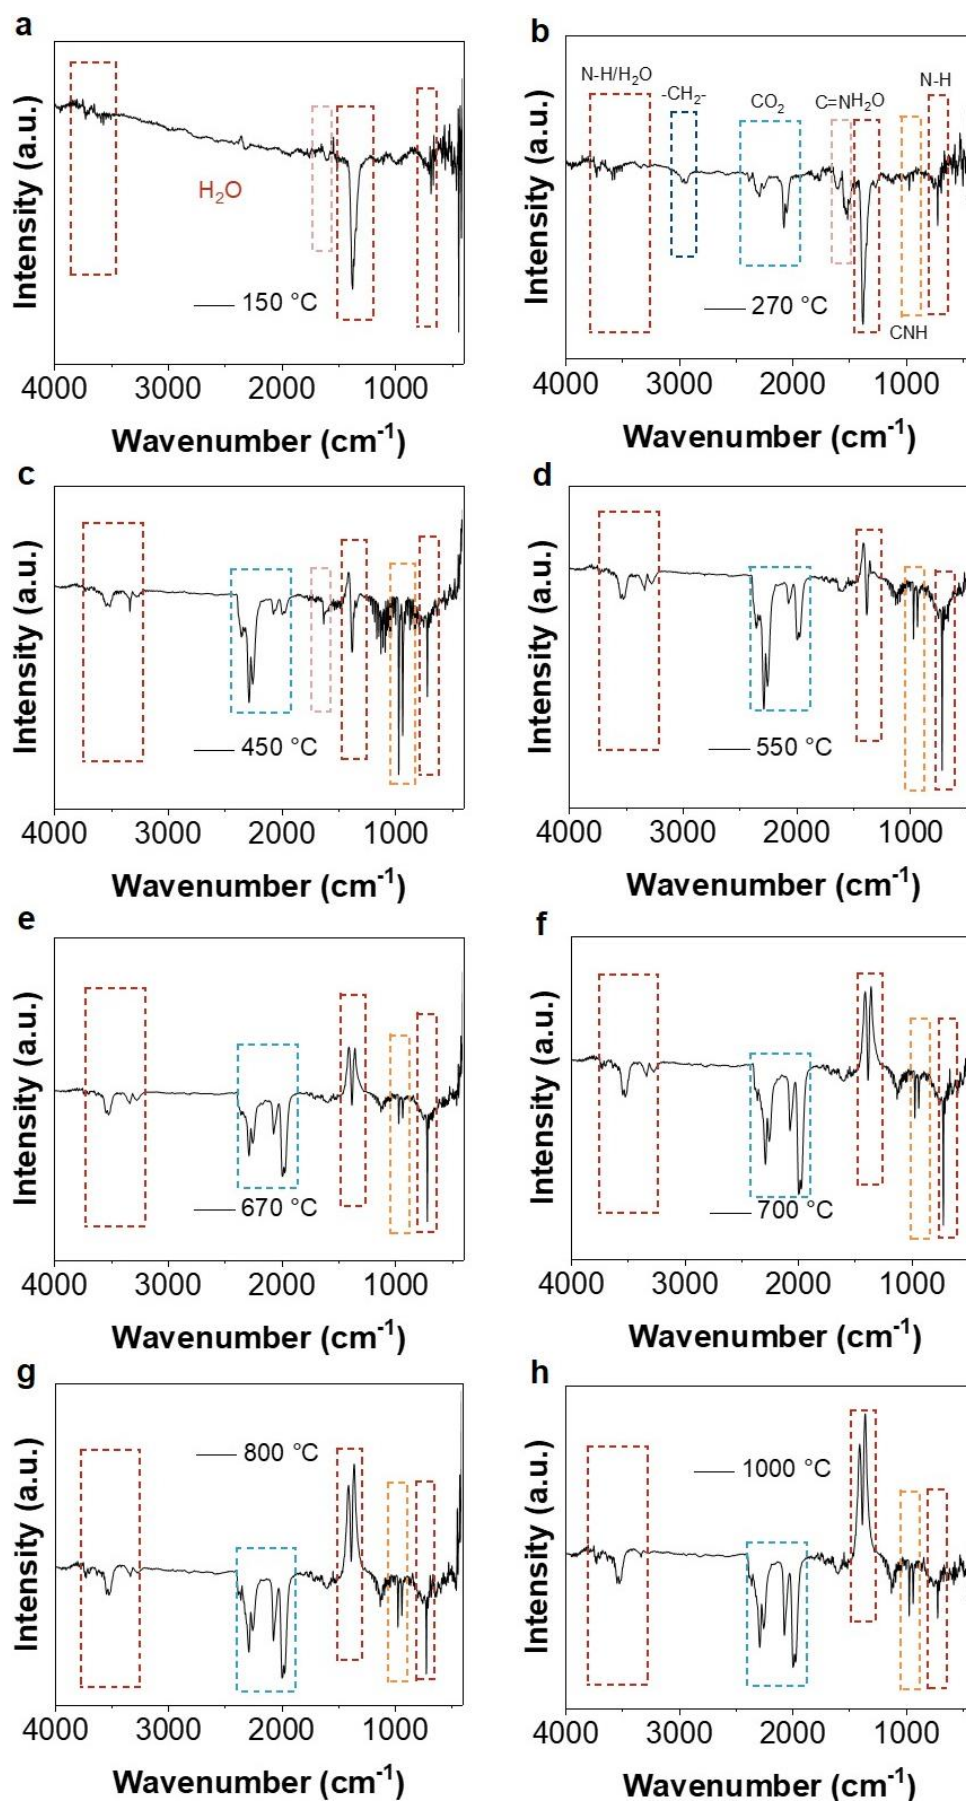

**Fig. S6** FT-IR spectra of the pyrolysis product of TCA+MA+LS precursors at different temperatures



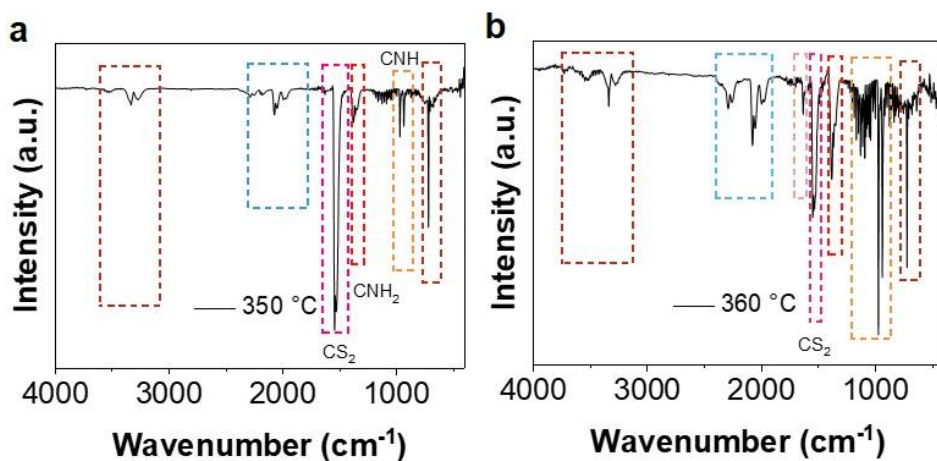

**Fig. S7** (a, b) FT-IR spectra of TCA+MA+LS precursors heat-treated at temperatures of 350 °C and 360 °C

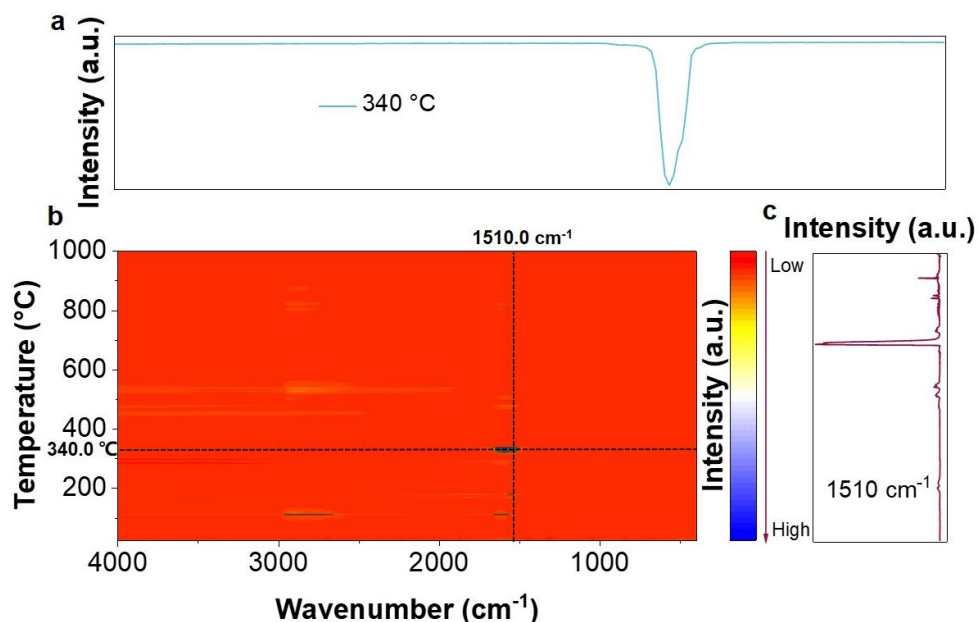

**Fig. S8** 2D temperature-dependent FT-IR spectrum of TCA+MA+LS precursor

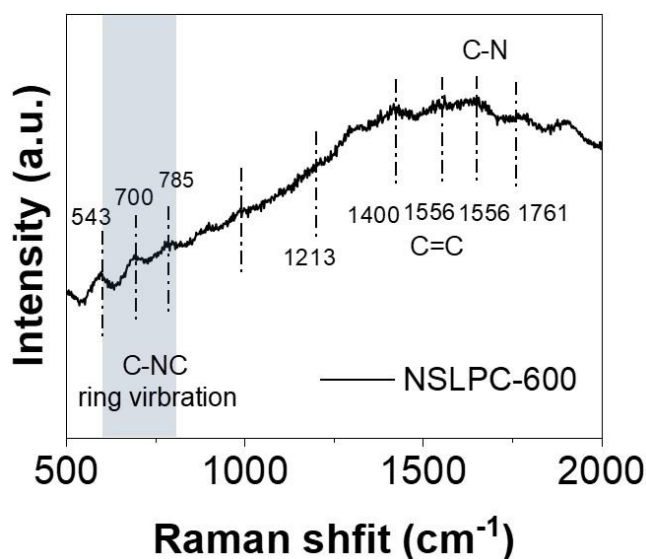

**Fig. S9** Raman spectra of the NSLPC-600

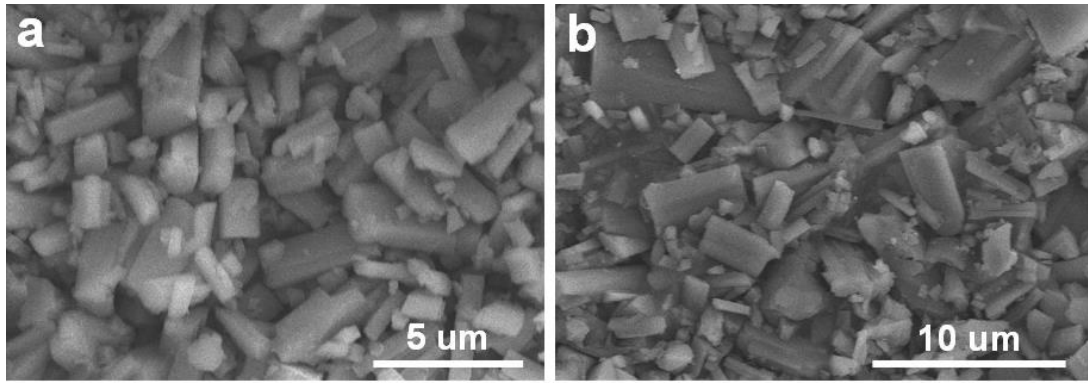

**Fig. S10** SEM images of the assembly of (a) TCA+MA and (b) TCA+MA+LS

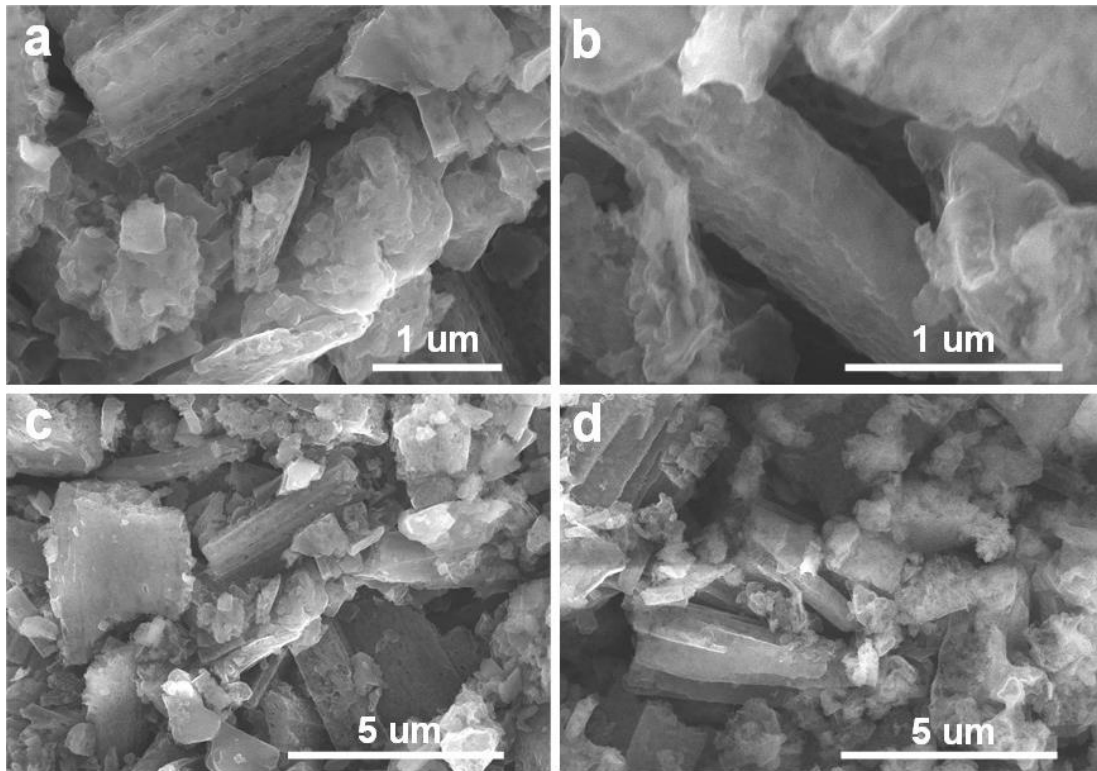

**Fig. S11** SEM images of (a, c) NSLPC-550 and (b, d) NSLPC-600

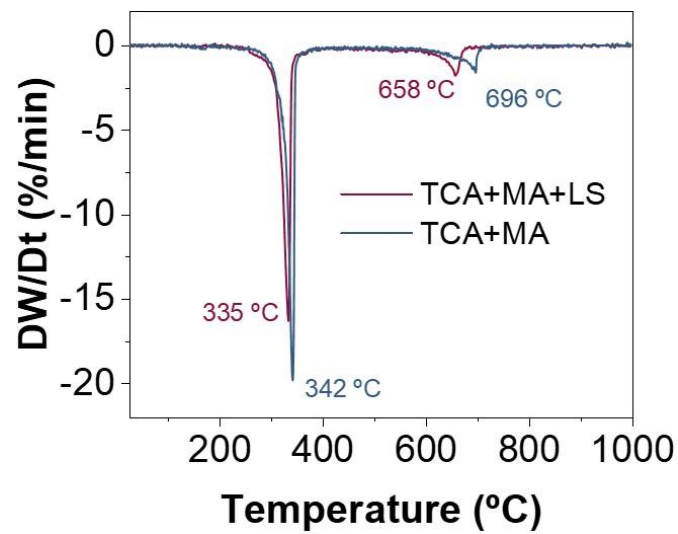

**Fig. S12** The differential TGA curves of TCA+MA+LS and TCA+MA

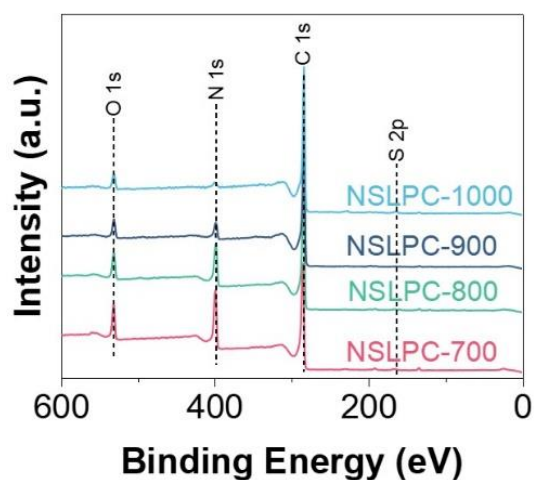

Fig. S13 XPS spectra of NSLPC-700, NSLPC-800, NSLPC-900, and NSLPC-1000

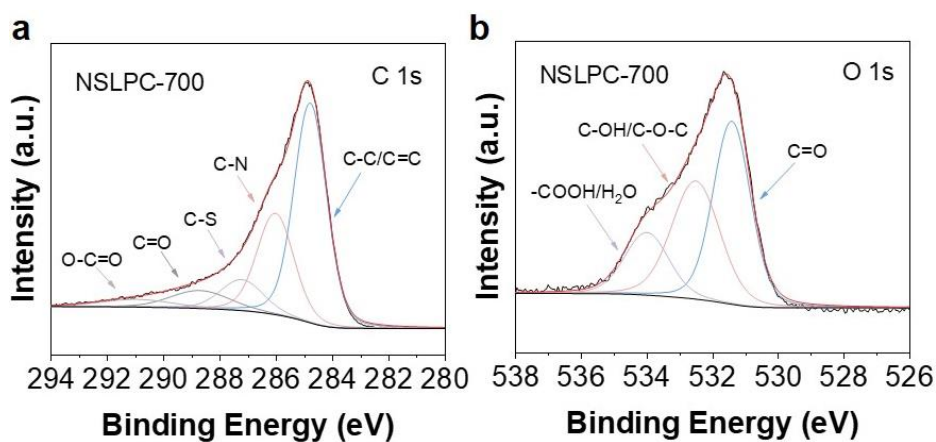

Fig. S14 High-resolution (a) C 1s and (b) O 1s XPS spectra of NSLPC-700

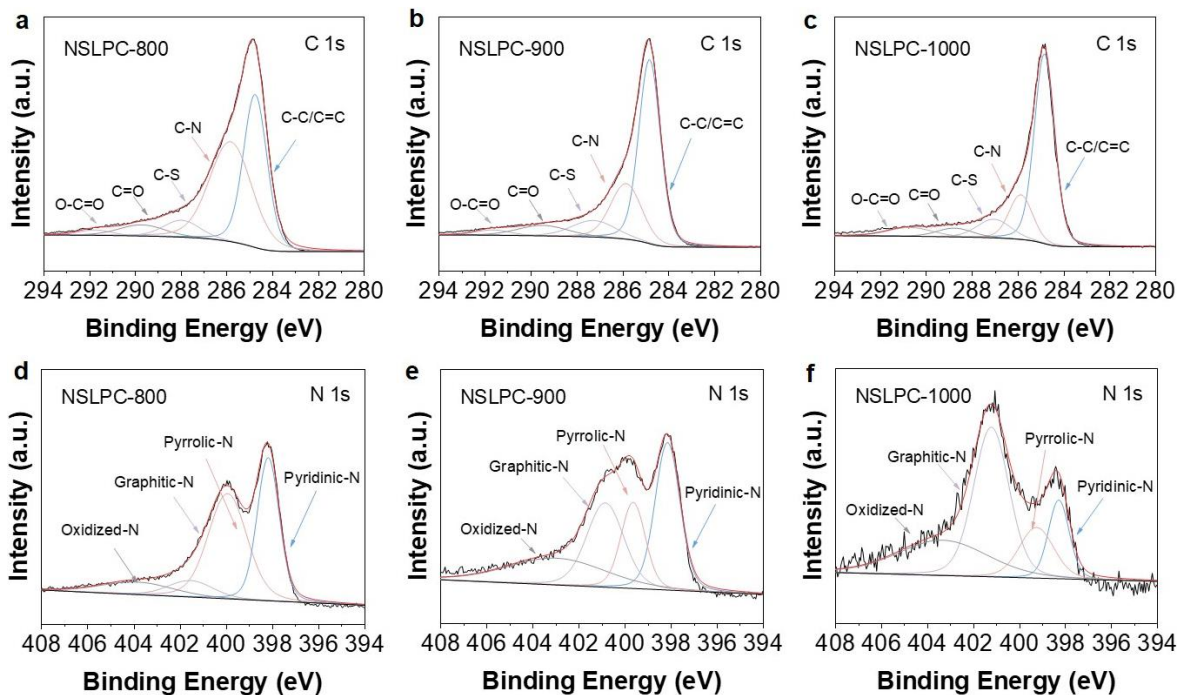

Fig. S15 High-resolution (a) C 1s and (d) N 1s XPS spectra of the NSLPC-800. High-resolution (b) C 1s and (e) N 1s XPS spectra of the NSLPC-900. High-resolution (c) C 1s, (f) N 1s XPS spectra of the NSLPC-1000

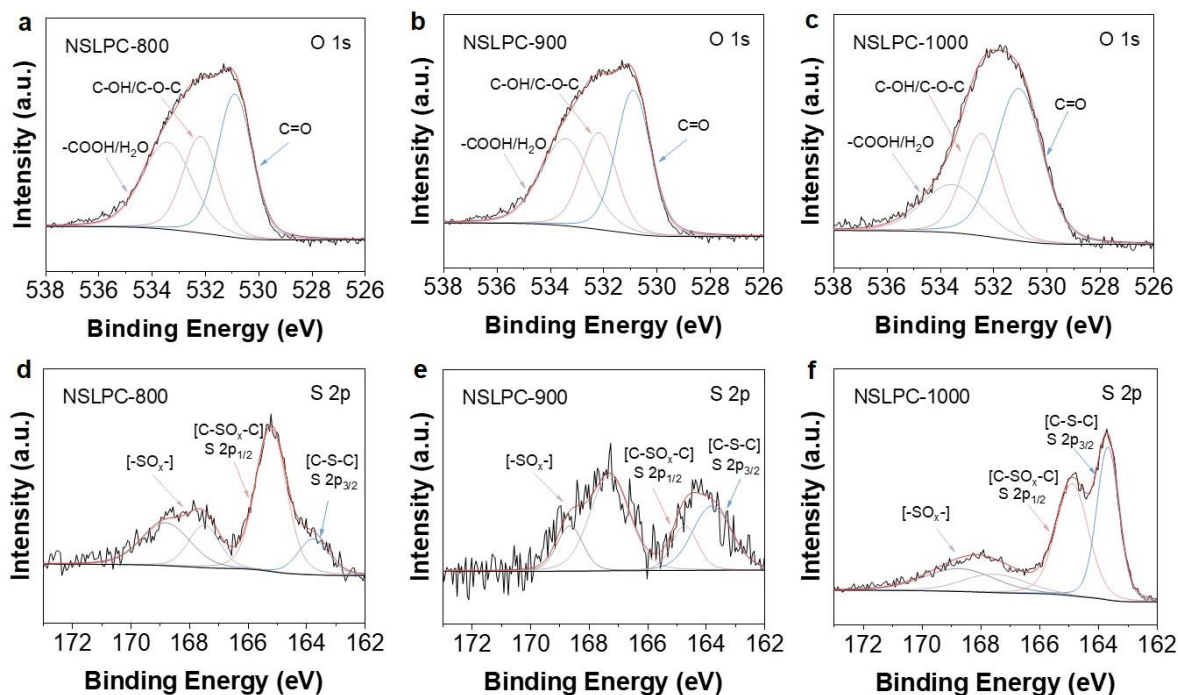

**Fig. S16** High-resolution (a) O 1s and (d) S 2p XPS spectra of the NSLPC-800. High-resolution (b) O 1s and (e) S 2p XPS spectra of the NSLPC-900. High-resolution (c) O 1s and (f) S 2p XPS spectra of the NSLPC-1000

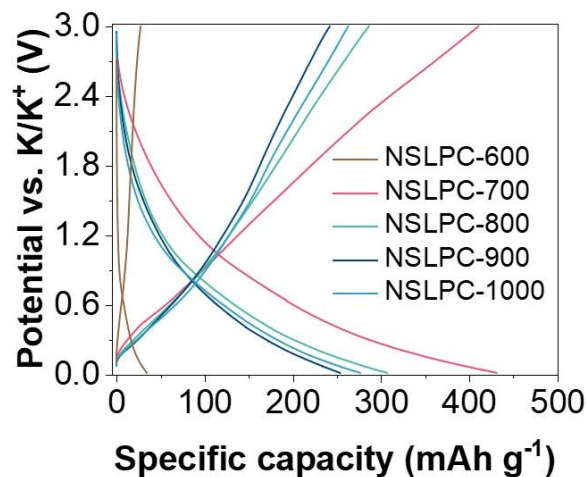

**Fig. S17** Comparison of the GCD curves of different samples at  $0.05 \text{ A g}^{-1}$

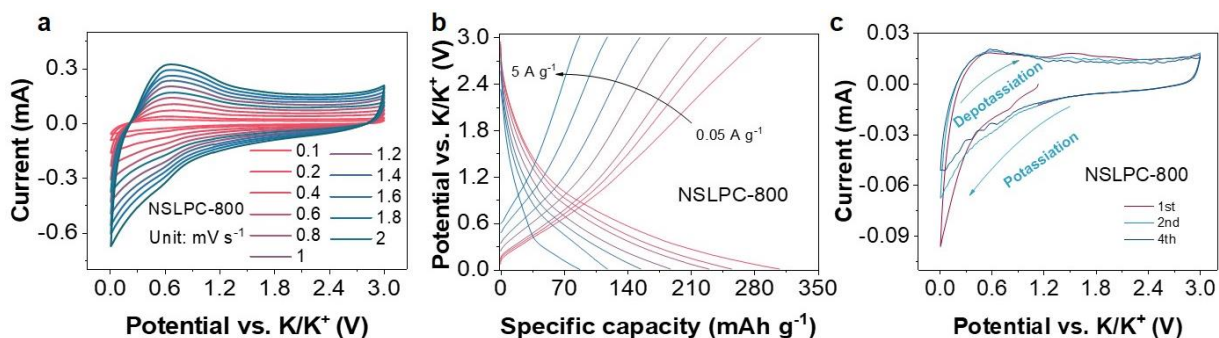

**Fig. S18** (a) CV curves of NSLPC-800 anode at different scan rates. (b) GCD curves of NSLPC-800 anode at different current densities. (c) CV curves of NSLPC-800 anode at a scan rate of  $0.1 \text{ mV s}^{-1}$

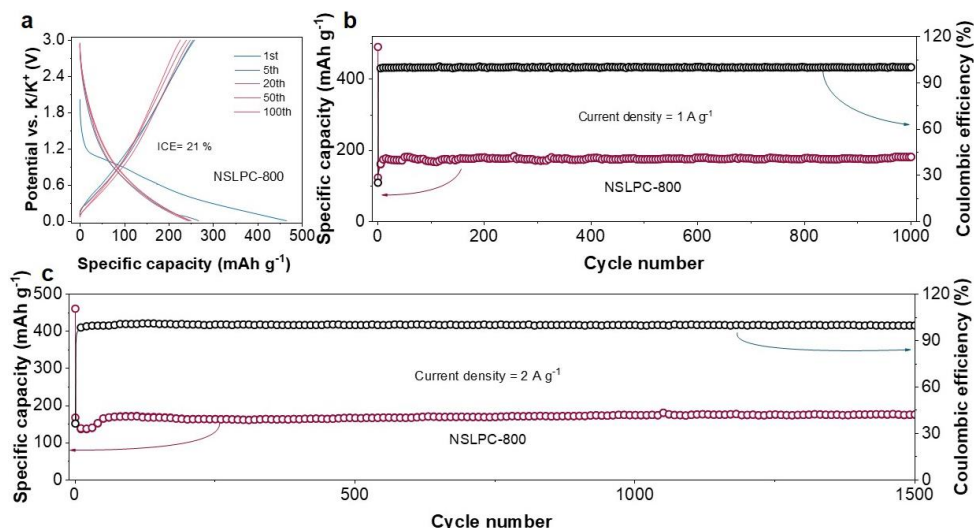

**Fig. S19** (a) GCD curves of NSLPC-800 anode at a current density of 0.05 A g<sup>-1</sup>. GCD cycling performance of the NSLPC-800 anode at current densities of (b) 1 A g<sup>-1</sup> and (c) 2 A g<sup>-1</sup>

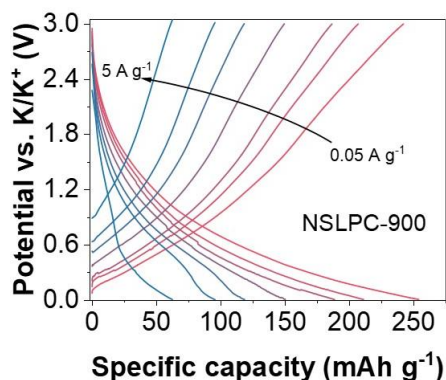

**Fig. S20** GCD curves of NSLPC-900 anode at different current densities

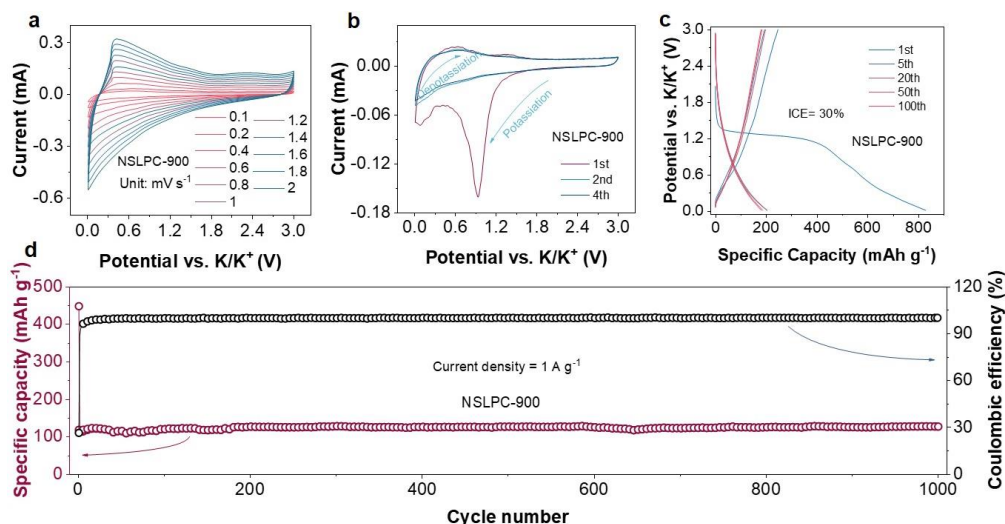

**Fig. S21** (a) CV curves of NSLPC-900 anode at different scan rates. (b) CV curves of NSLPC-900 at initial cycles at a scan rate of 0.1 mV s<sup>-1</sup>. (c) Cycling performance of the NSLPC-900 anode at a current density of 0.05 A g<sup>-1</sup>. (d) Cycling performance of the NSLPC-900 anode at a current density of 1 A g<sup>-1</sup>

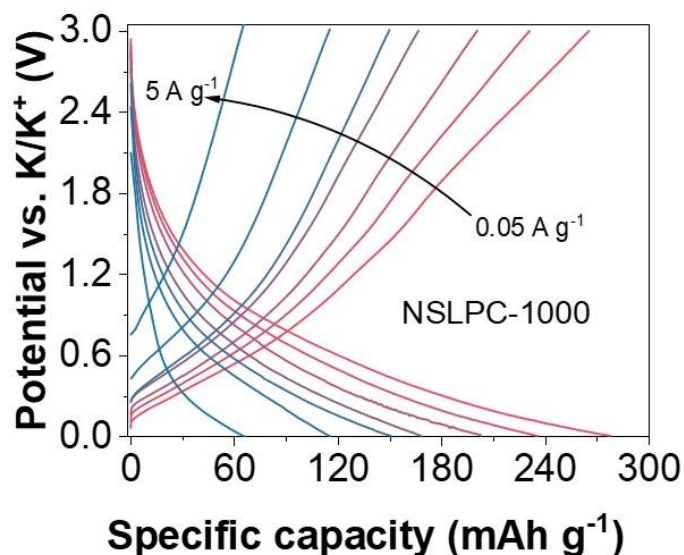

**Fig. S22** GCD curves of NSLPC-1000 anode at different current densities

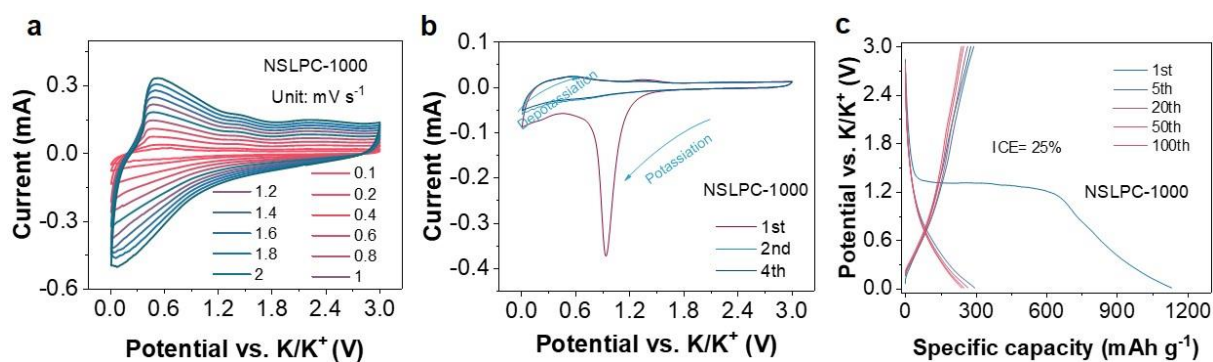

**Fig. S23** (a) CV curves of NSLPC-1000 at different scan rates. (b) CV curves at initial cycles at a scan rate of  $0.1 \text{ mV s}^{-1}$ . (c) GCD curves of NSLPC-1000 anode at a current density of  $0.05 \text{ A g}^{-1}$

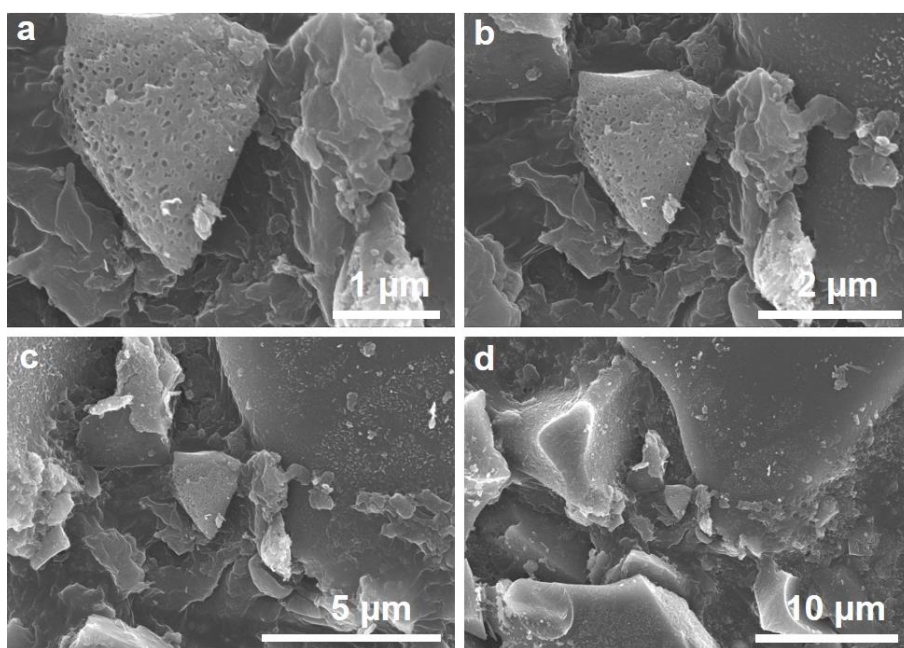

**Fig. S24** SEM images of LPC-700

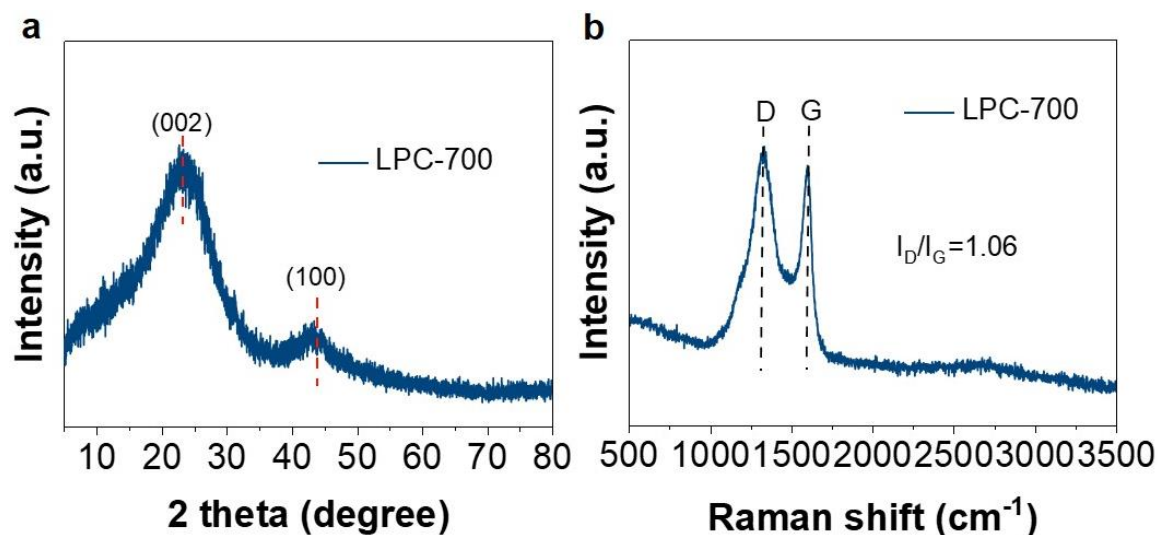

Fig. S25 (a) XRD pattern of LPC-700. (b) Raman spectra of LPC-700

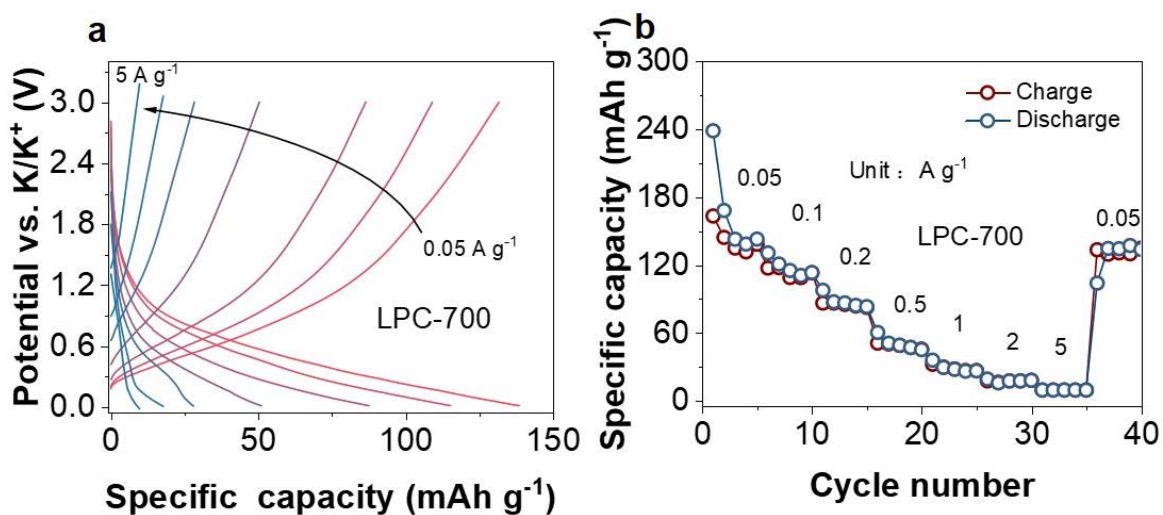

Fig. S26 (a) GCD curves of LPC-700 anode at the different current densities. (b) Rate performance of LPC-700 anode

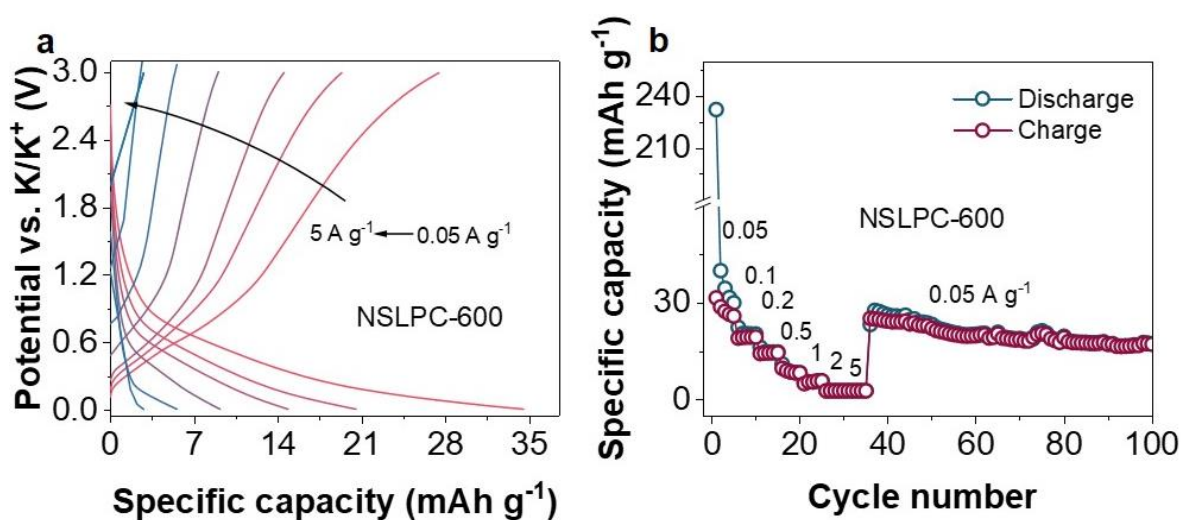

Fig. S27 (a) GCD curves of NSLPC-600 anode at different current densities. (b) Rate performance of NSLPC-600 anode

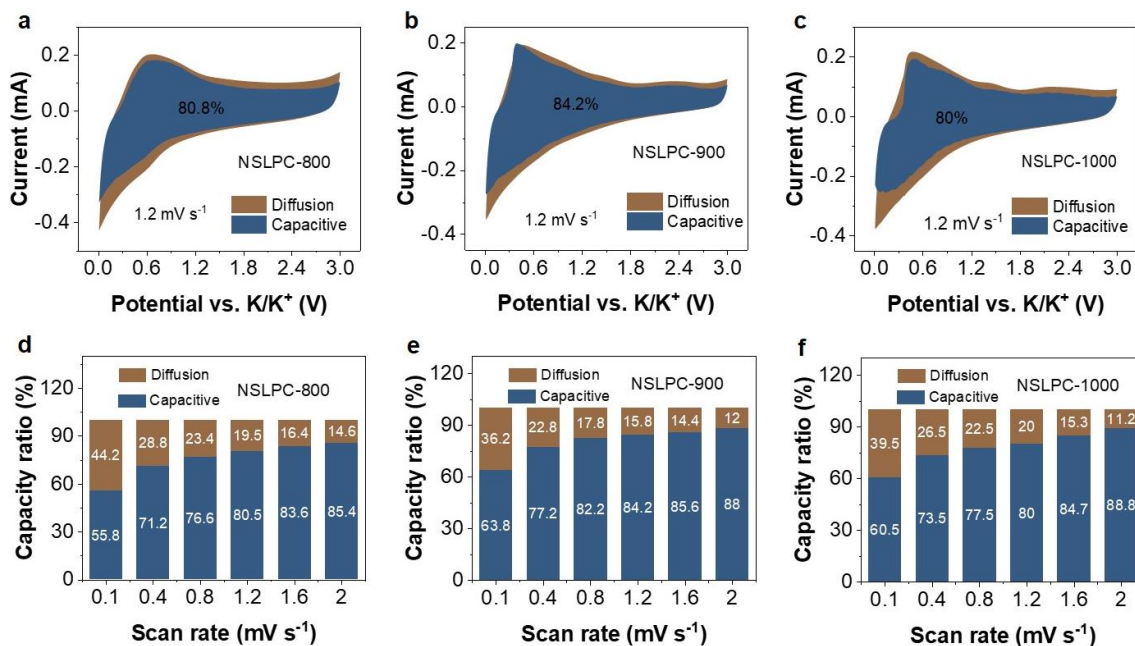

**Fig. S28** Capacitive charge-storage contribution in (a) NSLPC-800, (b) NSLPC-900 and (c) NSLPC-1000 at a specific scan rate of  $1.2 \text{ mV s}^{-1}$ . Contribution ratios of the capacitive process in (d) NSLPC-800, (e) NSLPC-900 and (f) NSLPC-1000 at different scan rates

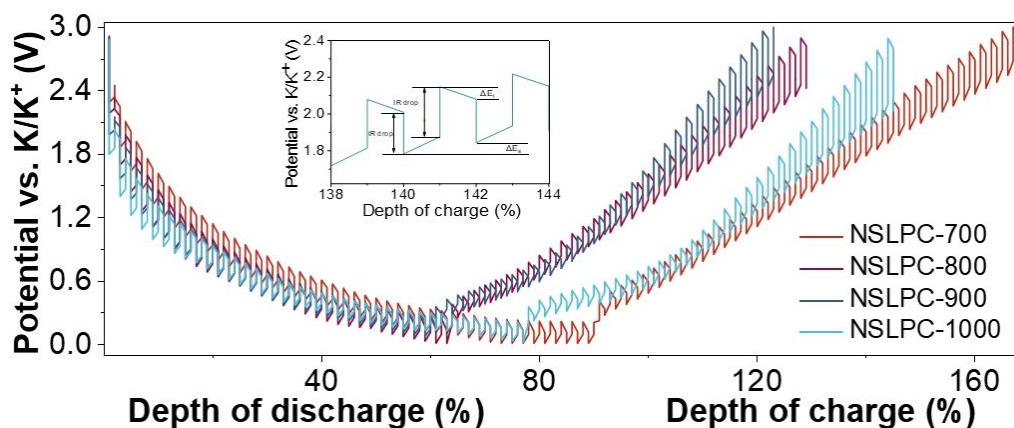

**Fig. S29** GITT profiles of the state of the potassiation and depotassiation processes. Testing conditions: this test is tested under the condition of charging or discharging pulses for 5 min each at a constant (pulsed) current density of  $0.1 \text{ A g}^{-1}$  for 2 hours

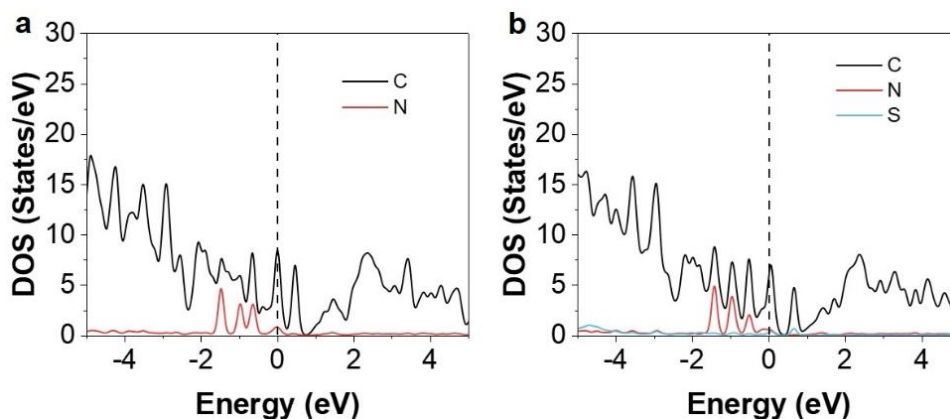

**Fig. S30** (a) DOS of C and N element. (b) DOS of C, N, and S elements



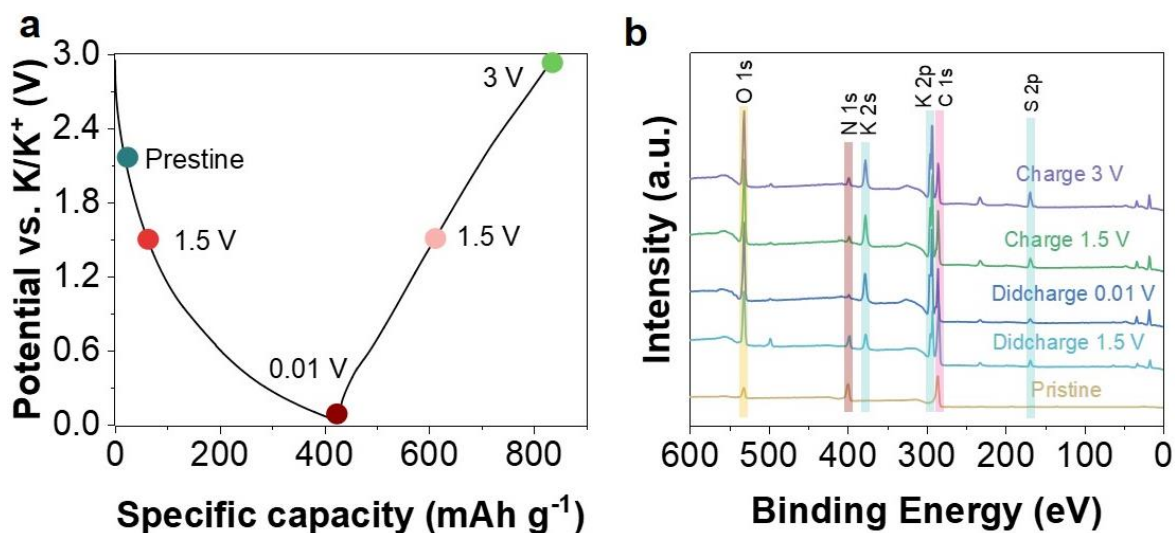

**Fig. S31** (a) GCD curves of NSLPC-700 at different charge and discharge stages. (b) XPS spectra NSLPC-700 at different charge and discharge states

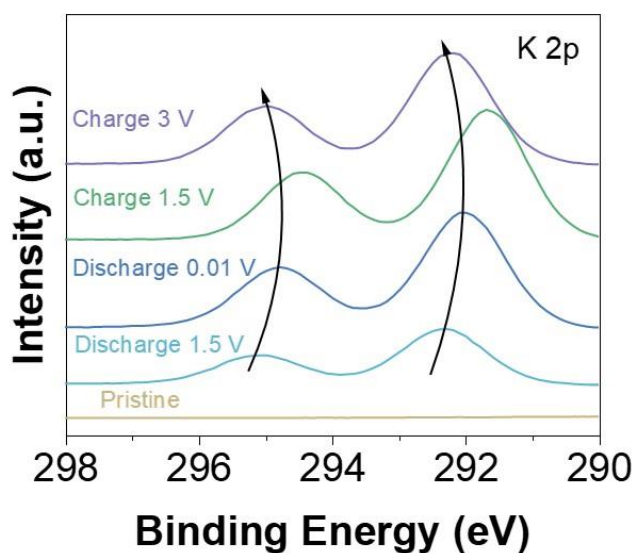

**Fig. S32** High-resolution C 1s XPS spectra of NSLPC-700 during the initial discharge and charge cycle

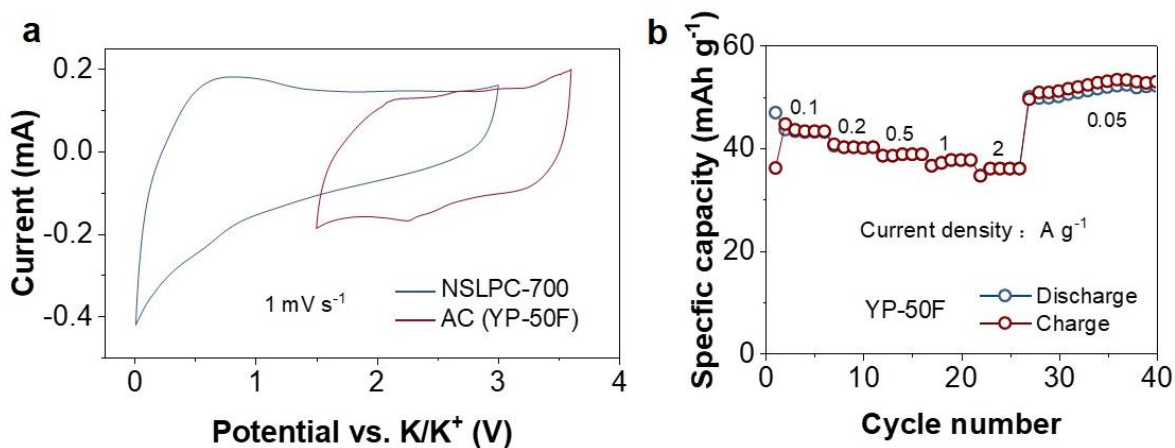

**Fig. S33** (a) CV curves of the NSLPC-700 and the AC (YP-50F) electrodes in half cells. (b) Rate performance of YP-50F cathode

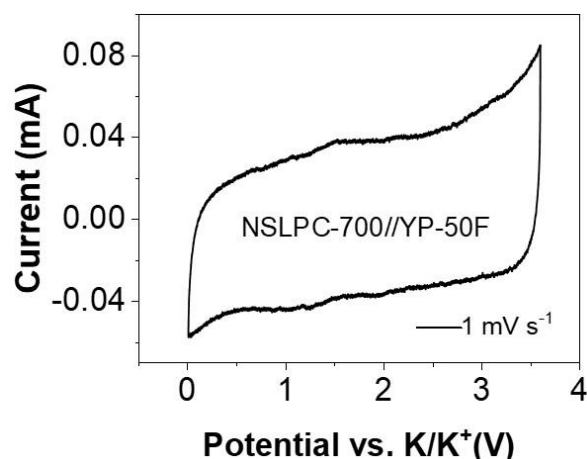

**Fig. S34** CV curves of PIHCs assembled by NSLPC-700//YP-50F at a scan rate of  $1 \text{ mV s}^{-1}$

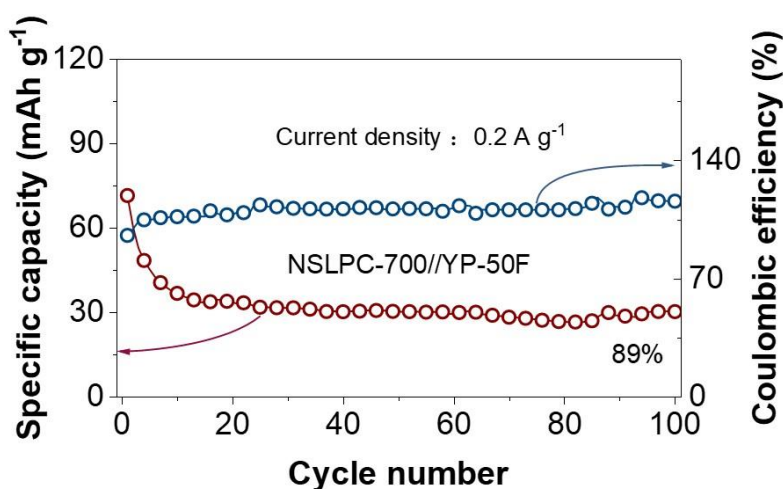

**Fig. S35** The cycling performance of PIHCs at a current density of  $0.2 \text{ A g}^{-1}$  (The specific capacity was calculated based on the total mass of the anode and cathode electrodes)

### Supplementary References

- [S1] J. Ruan, F. Mo, Z. Chen, M. Liu, S. Zheng et al., Rational construction of nitrogen-doped hierarchical dual-carbon for advanced potassium-ion hybrid capacitors. *Adv. Energy Mater.* **10**(15), 1904045 (2020). <https://doi.org/10.1002/aenm.201904045>
- [S2] X. Zhang, W. Jian, L. Zhao, F. Wen, J. Chen et al., Direct carbonization of sodium lignosulfonate through self-template strategies for the synthesis of porous carbons toward supercapacitor applications. *Colloids Surf. Physicochem. Eng. Aspects* **636**, 128191 (2022). <https://doi.org/10.1016/j.colsurfa.2021.128191>
- [S3] X. Chang, X. Zhou, X. Ou, C.S. Lee, J. Zhou et al., Ultrahigh nitrogen doping of carbon nanosheets for high capacity and long cycling potassium ion storage. *Adv. Energy Mater.* **9**(47), 1902672 (2019). <https://doi.org/10.1002/aenm.201902672>
- [S4] W. Zhang, M. Sun, J. Yin, W. Wang, G. Huang et al., Rational design of carbon anodes by catalytic pyrolysis of graphitic carbon nitride for efficient storage of Na and K mobile ions. *Nano Energy* **87**, 106184 (2021). <https://doi.org/10.1016/j.nanoen.2021.106184>
- [S5] T. Lu, Molclus. (Beijing Kein Research Center for Natural Science, 2016). <http://www.keinsci.com/research/molclus.html>
- [S6] C. Bannwarth, S. Ehlert, S. Grimme, GFT<sub>2</sub>-XTB-an accurate and broadly parametrized

- self-consistent tight-binding quantum chemical method with multipole electrostatics and density-dependent dispersion contributions. *J. Chem. Theory Comput.* **15**(3), 1652-1671 (2019). <https://doi.org/10.1021/acs.jctc.8b01176>
- [S7] T. Lu, Q. Chen, Independent gradient model based on hirshfeld partition: a new method for visual study of interactions in chemical systems. *J. Comput. Chem.* **43**(8), 539-555 (2022). <https://doi.org/10.1002/jcc.26812>
- [S8] T. Lu, F. Chen, Multiwfn: a multifunctional wavefunction analyzer. *J. Comput. Chem.* **33**(5), 580-592 (2012). <https://doi.org/10.1002/jcc.22885>
- [S9] W. Humphrey, A. Dalke, K. Schulten, VMD: visual molecular dynamics. *J. Mol. Graphics* **14**, 33-38 (1996). [https://doi.org/10.1016/0263-7855\(96\)00018-5](https://doi.org/10.1016/0263-7855(96)00018-5)
- [S10] G. Kresse, D. Joubert, From ultrasoft pseudopotentials to the projector augmented-wave method. *Phys. Rev. B* **59**, 1758-1775 (1999). <https://doi.org/10.1103/PhysRevB.59.1758>
- [S11] J.P. Perdew, K. Burke, M. Ernzerhof, Generalized gradient approximation made simple. *Phys. Rev. Lett.* **77**(18), 3865-3868 (1996). <https://doi.org/10.1103/PhysRevLett.77.3865>
- [S12] S. Grimme, J. Antony, S. Ehrlich, H. Krieg, A consistent and accurate ab initio parametrization of density functional dispersion correction (DFT-D) for the 94 elements H-Pu. *J. Chem. Phys.* **132**(15), 154104 (2010). <https://doi.org/10.1063/1.3382344>
